# Supplementary material for: Cobs Porous Carbon-Based Materials With High Energy And Excellent Cycle Stability For Supercapacitor Applications
Source: Research Square preprint supplement (doi:10.21203/rs.3.rs-889321/v1), 2021-09-24
Supplement: Supplementary file 1 [file 754945e400cd10e3747bdad6.docx]

**Supplementary information**

**Cobs porous carbon-based materials with high energy and excellent cycle stability for supercapacitor applications**

**Moses Kigozi a, b, *, Richard K Koech a, Kingsley Orisekeh a, Ravi Kali c, Omar L M Kamoga b, Balaji Padya c, Abdulhakeem Bello a, Gabriel N Kasozi d, Pawan Kumar Jain c, John Baptist Kirabira e, Azikiwe Peter Onwualu a,Nelson Y Dzade f, ***

*a Department of Materials Science and Engineering, African University of Science and Technology P.O. BOX 681 Garki, Abuja Nigeria.*

*b Department of Chemistry, Faculty of Science and Education, Busitema University P.O BOX 236 Tororo – Uganda.*

*c Centre for Carbon Materials, International Advanced Research Centre for Powder Metallurgy & New Materials (ARCI), Balapur P. O 500 005 Hyderabad India.*

*dDepartment of Chemistry, College of Natural Science, Makerere University, P.O BOX 7062, Kampala, Uganda*

*eDepartment of Mechanical Engineering, Makerere University, P.O BOX 7062, Kampala, Uganda*

*f School of Chemistry, Cardiff University, Main Building, Park Place, CF10 3AT, Cardiff, United Kingdom.*

**Corresponding Authors email:* [*DzadeNY@cardiff.ac.uk*](mailto:DzadeNY@cardiff.ac.uk) */* [*mkigozi@aust.edu.ng*](mailto:mkigozi@aust.edu.ng)


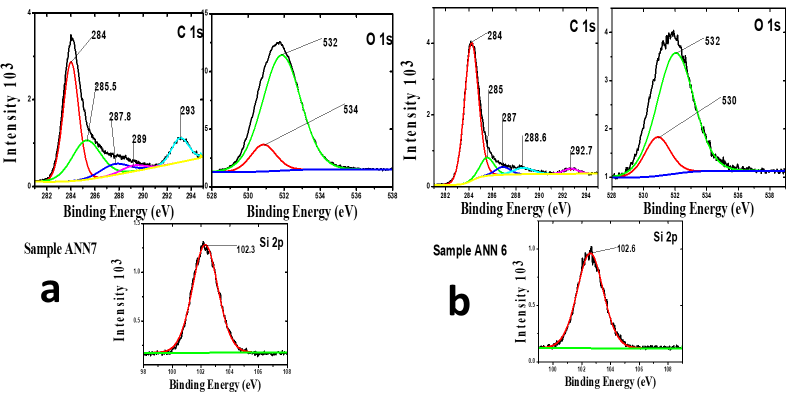


**Figure S1**: XPS deconvoluted spectra for (a) (ANN7) and (b) ANN6 activated samples

**Figure S2**: GCD for 3 electrode system for ANN6, ANN7 and ANN8 activated samples at different current density.

**Figure S3**: CV scanned at 5mV/s before and after stability test

**Figure S4**: (a) specific capacitance at different current density, (b) the Ragone plots for ANN6, ANN7 and ANN8 based supercapacitors.

**Figure S5**: EIS for zoomed high frequency for ANN6, ANN7, and ANN8 activated carbon scanned at 10mV

**Figure S6:** EIS scanned at different potential 10mV and 20mV

**Figure S7:** Stability by voltage holding at maximum potential for 10hours before discharge

**Figure S8**: Self-discharge of devices from 1.0V after stability test.
